# Supplementary material for: UniPR1331, a small molecule targeting Eph/ephrin interaction, prolongs survival in glioblastoma and potentiates the effect of antiangiogenic therapy in mice
Source: PubMed Central journal article supplement (PMC5966254; doi:10.18632/oncotarget.25272), 2018-05-11
Supplement: oncotarget-09-24347-s001.pdf [file oncotarget-09-24347-s001.pdf]

## UniPR1331, a small molecule targeting Eph/ephrin interaction, prolongs survival in glioblastoma and potentiates the effect of antiangiogenic therapy in mice

### SUPPLEMENTARY MATERIALS

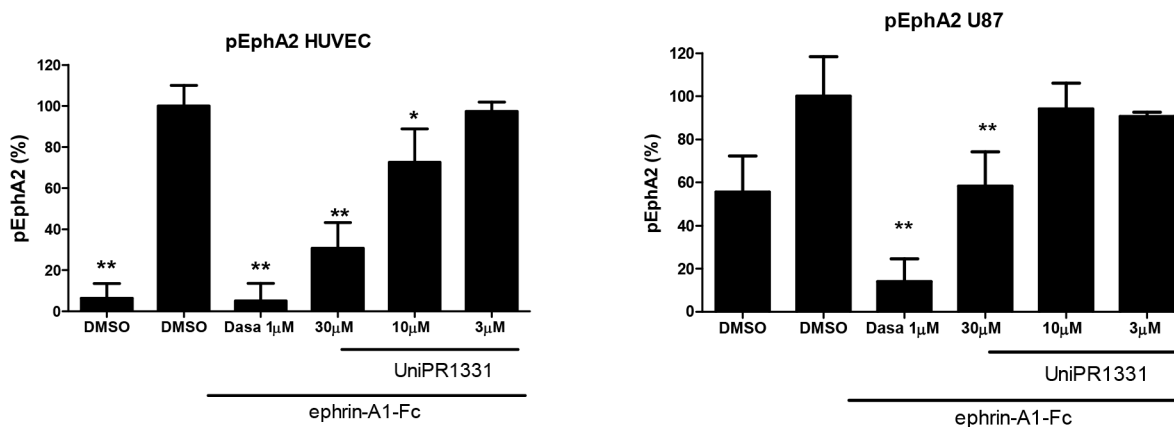

**Supplementary Figure 1: EphA2 phosphorylation *in vitro* on HUVE and U87MG cells.** UniPR1331 dose-dependently inhibited EphA2 activation induced by ephrin-A1-Fc in U87MG and HUVE cells. Cells were pretreated for 20 minutes with 0.3% DMSO, or the indicated concentrations ( $\mu$ M) of compounds, and then stimulated for 20 minutes with ephrin-A1-Fc. Phospho-EphA2 levels are relative to ephrin-A1-Fc+DMSO. Data are the means of at least three independent experiments  $\pm$  st. dev. One-way ANOVA followed by Dunnet's post-test was performed to compare ephrin-A1-Fc+DMSO to all the other columns. \*,  $p < 0.05$ , \*\*,  $p < 0.01$ .

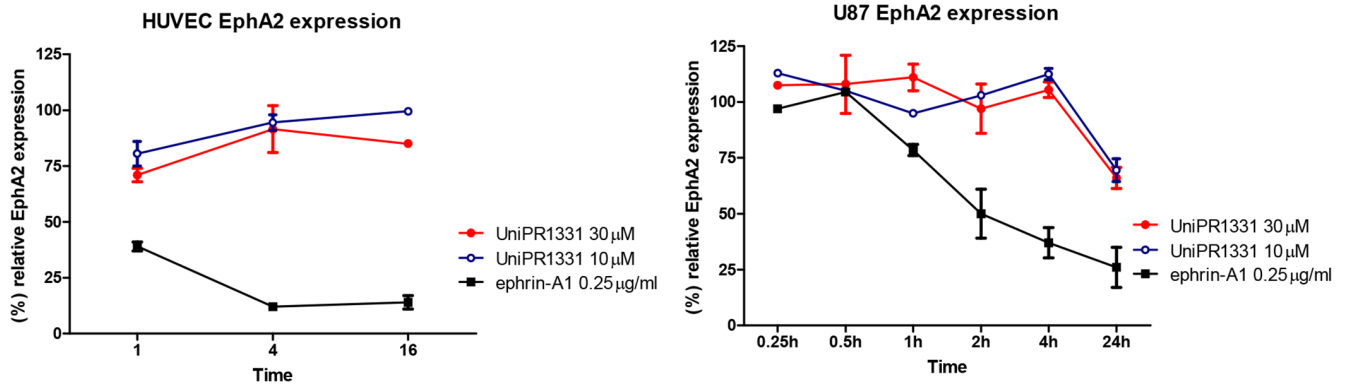

**Supplementary Figure 2: EphA2 expression *in vitro* or UniPR1331 incubation on HUVE and U87MG cells.** Ephrin-A1 time-dependently reduced EphA2 expression whereas UniPR1331 reduced its expression only after 24h incubation in U87MG cells. Cells were treated for the indicated time with 0.3% DMSO, 0.25 $\mu$ g/ml ephrin-A1 or 10/30 $\mu$ M UniPR1331. Data were normalized for each time point to DMSO as 100% EphA2 expression. Experiments were performed via ELISA using the product DYC3035-2 of R&D systems following manufacturer's procedures.

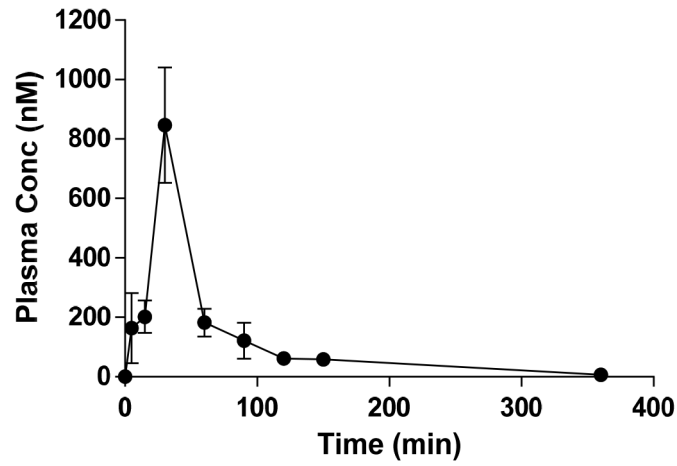

**Supplementary Figure 3: Pharmacokinetic.** Plasma profile of UniPR1331. Plasma concentrations (nM) of the compounds over 360 minutes time course after a single administration in male mice (30 mg/kg, os) are reported as obtained from HPLC/MS analysis. Data are the means of at least three independent experiments  $\pm$  SEM. Brain concentrations (pmol/g) of UniPR1331 over 360 minutes time course after a single administration in male mice (30 mg/kg, os) are reported as obtained from HPLC/MS analysis. Data are the means of three independent experiments  $\pm$  SEM

| Time (min) | UniPR1331<br>Brain Concentration (pmol/g) <sup>a</sup> | SEM  |
|------------|--------------------------------------------------------|------|
| 0          | 0                                                      | -    |
| 15         | 5.5                                                    | 1.0  |
| 30         | 98                                                     | 17.8 |
| 60         | 33                                                     | 9.0  |
| 360        | N. D. <sup>b</sup>                                     | -    |

<sup>a</sup> Among found for g of tissue. pmol/g  $\approx$  nM. Not Detected.

**Supplementary Table 1: UniPR1331 activity on several targets**

| <b>Target</b>         | <b>Study</b> | <b>% Inhibition or activation</b> | <b>Concentration</b> |
|-----------------------|--------------|-----------------------------------|----------------------|
| EphA2 inhibition      | LANCE        | Inactive                          | 10 microMolar        |
| VEGFR inhibition      | LANCE        | Inactive                          | 10 microMolar        |
| K ATP channel         | Binding      | Inactive                          | 10 microMolar        |
| PDGFR                 | Binding      | Inactive                          | 10 microMolar        |
| TGF beta              | Binding      | Inactive                          | 10 microMolar        |
| ICAM-1                | Functional   | Inactive                          | 10 microMolar        |
| LXR alpha agonist     | Functional   | Inactive                          | 10 microMolar        |
| LXR alpha antagonist  | Functional   | Inactive                          | 10 microMolar        |
| LXR beta agonist      | Functional   | Inactive                          | 10 microMolar        |
| LXR beta antagonist   | Functional   | Inactive                          | 10 microMolar        |
| EGFR agonist          | Functional   | Inactive                          | 10 microMolar        |
| EGFR antagonist       | Functional   | Inactive                          | 10 microMolar        |
| FGFR antagonist       | Functional   | Inactive                          | 10 microMolar        |
| PPAR gamma agonist    | Functional   | Inactive                          | 10 microMolar        |
| PPAR gamma antagonist | Functional   | Inactive                          | 10 microMolar        |
| GLP1 agonist          | Functional   | Inactive                          | 10 microMolar        |
| GLP1 antagonist       | Functional   | Inactive                          | 10 microMolar        |
| TGR5 agonist          | Functional   | Inactive                          | 10 microMolar        |
| DPP-IV                | Enzymatic    | Inactive                          | 10 microMolar        |

**Supplementary Table 2: Biochemical chemistry and histological analysis**

|                                    | <b>Treated</b> | <b>Control</b> |
|------------------------------------|----------------|----------------|
| Leucocytes (10 <sup>3</sup> /μl)   | 6.6±0.9        | 5.0±1.9        |
| Neutrophils (10 <sup>3</sup> /μl)  | 2±0.2          | 1.6±0.4        |
| Lymphocytes (10 <sup>3</sup> /μl)  | 4.3±0.7        | 3.3±1.4        |
| Monocytes (10 <sup>3</sup> /μl)    | 0.18±0.06      | 0.14±0.16      |
| Eosinophils (10 <sup>3</sup> /μl)  | 0.04±0.02      | 0±0            |
| Basophils (10 <sup>3</sup> /μl)    | 0.02±0.01      | 0.02±0.02      |
| Erythrocytes (10 <sup>6</sup> /μl) | 8.9±0.1        | 8.9±0.1        |
| Emoglobin (g/dl)                   | 14.2±0.2       | 12.1±2.1       |
| Hematocrit (%)                     | 40.6±0.7       | 40.2±0.6       |
| Mean cell volume (fl)              | 45.3±0.2       | 45.4±0.3       |
| Hb cell mean cont (pG)             | 15.9±0.1       | 16.0±0.1       |
| Platelets (10 <sup>3</sup> /μl)    | 207±87         | 714±171        |
| Mean platelet volume (fl)          | 5.5±0.2        | 5.1±0.2        |
| Glucose (mg/dl)                    | 154±8          | 151±10         |
| Urea-N (mg/dl)                     | 53±3           | 51±8           |
| Cholesterol (mg/dl)                | 73.6±3.5       | 64±4           |
| Total protein (g/dl)               | 4.7±0.1        | 4.6±0.2        |
| ALT (IU)                           | 53.2±3.8       | 44.8±6.8       |
| Creatinine (mg/dl)                 | 0.454±0.03     | 0.508±0.03     |
| AST/GOT (UI)                       | 125±8          | 117±12         |

Observation of mice treated with UniPR1331 did not result in any alteration in eyes, mucous membranes, occurrence of secretions and excretions and autonomic activity (e.g., lacrimation, piloerection, unusual respiratory pattern), changes in gait, posture and response to handling as well as the presence of clonic or tonic movements, stereotypes (e.g., excessive grooming, repetitive circling) or bizarre behavior (e.g., self-mutilation, walking backwards). No other major neurological difference were detected at observation. Hematology and clinical biochemistry analysis reported a low platelet count of 207x10<sup>3</sup>/μl but no clinically significant difference in other studied parameters (blood count, Hb, hematocrit, glucose, total cholesterol, urea, creatinine, total protein and albumin, aspartate aminotransferase, alkaline phosphatase) were found. Rare focus of cellular injury with increased mitoses and nuclear alterations were observed in liver; adaptive changes (cellular swollen and cellular hypertrophy) were observed in both liver and kidney. No alteration was found in testis, heart, gastrointestinal tract, lung and CNS.

**Supplementary Table 3: Antitumor activity of UniPR1331 alone or in combination with Bevacizumab in U87MG xenografts**

| <b>*p&lt;0.05 vs controls<br/>** p&lt;0.005 (beva vs Uni)</b> | <b>Weight of mice (gr +/- SE)</b> | <b>Tumor weight (mg +/- SE)</b> | <b>TTP (days +/- SE)</b> | <b>Vessel count (+/- SE)</b> | <b>Necrotic areas (% +/- SE)</b> | <b>Ki67 (% +/- SE)</b> | <b>Apoptosis (% +/- SE)</b> |
|---------------------------------------------------------------|-----------------------------------|---------------------------------|--------------------------|------------------------------|----------------------------------|------------------------|-----------------------------|
| Saline                                                        | 24.5 ± 0.6                        | 709 ± 145                       | 9.9 ± 0.9                | 23.2± 2.3                    | 25.0 ± 3.5                       | 44.6 ± 3.5             | < 2                         |
| UniPR1331                                                     | 26.0 ± 0.4                        | 372 ± 72*                       | 15.8± 0.9**<br>and **    | 5.5 ± 0.2**                  | 16.5 ± 3.5£                      | 14.5 ± 2.5**           | 8.5 ± 1.1                   |
| Bevacizumab                                                   | 24.8 ± 0.55                       | 360± 94*                        | 13.8± 0.5**, *           | 6.4±0.5**, £                 | 27.0 ± 3.0*                      | 22.6 ± 1.9**           | < 2                         |
| UniPR1331 + Bevacizumab                                       | 25.5 ± 0.3                        | 179 ± 59**, £                   | 22.2± 0.8**              | 1.3 ± 0.2**                  | 35.5 ± 3.5*, **                  | 10.7 ± 1.5**           | 34.5 ± 3.5                  |

(1) no statistical significance in the weight of mice.

(2) \*p<0.005 vs Saline and \*\*p<0.0001 vs Saline no statistical significance between UniPR1331 and Bevacizumab; £ p<0.05 in the comparison between combination vs single treatments;

(3) \*\*p<0.0001 vs Saline and in the comparison between combination vs single treatments; \*p<0.005 in the comparison Bevacizumab vs UniPR1331.

(4) \*\*p<0.0001 vs Saline and combination vs single treatments; £P<0.05 Bevacizumab vs UniPR1331;

(5) \*p<0.005 and £p<0.05 vs saline; \*\*p<0.0001 combination vs UniPR1331, °p<0.005 combination vs Bevacizumab;

(6) \*\*p<0.0001 for all comparisons except £p<0.05 combination vs UniPR1331.

(7) \*\* p<0.001 vs saline.

**Supplementary Table 4: Comparison of Kaplan Meier curves in U87MG xenografts**

| <b>Comparison</b>                         | <b>Hazard ratio</b> | <b>Confidence interval</b> | <b>Significance</b> |
|-------------------------------------------|---------------------|----------------------------|---------------------|
| Vehicle vs UniPR1331                      | 3.84                | 1.20 to 9.82               | P < 0.0005          |
| Vehicle vs Bevacizumab                    | 3.79                | 1.29 to 11.13              | P<0.001             |
| UniPR1331 vs Bevacizumab                  | 1.86                | 0.74 to 4.67               | P = 0.0631          |
| Vehicle vs UniPR1331 +<br>Bevacizumab     | 4.70                | 1.88 to 14.86              | P<0.001             |
| UniPR1331 vs UniPR1331 +<br>Bevacizumab   | 3.45                | 1.21 to 9.87               | P < 0.001           |
| Bevacizumab vs UniPR1331<br>+ Bevacizumab | 4.24                | 1.89 to 12.93              | P<0.001             |

**Supplementary Table 5: Antitumor activity of UniPR1331 alone or in combination with Bevacizumab in U251MG xenografts**

| <b>Drug</b>             | <b>Weight of mice (gr +/- SE)*</b> | <b>Tumor weight (mg +/- SE)</b> | <b>TTP (days +/- SE)</b> | <b>Vessel count (+/- SE)</b> | <b>Necrotic areas (% +/- SE)</b> | <b>Ki67 (% +/- SE)</b> | <b>Apoptosis (% +/- SE)</b> |
|-------------------------|------------------------------------|---------------------------------|--------------------------|------------------------------|----------------------------------|------------------------|-----------------------------|
| Saline                  | 24.6 ± 0.8                         | 839± 175                        | 10.0 ± 3.0               | 33.2 ± 2.0                   | 18.0 ± 2.5                       | 38.4 ± 5.0             | < 2                         |
| UniPR1331               | 25.4 ± 0.5                         | 311 ± 60                        | 13.6± 3.7                | 11.6 ± 3.7**                 | 19.6 ± 1.8                       | 15.4 ± 1.5             | 8.5 ± 2.6**                 |
| Bevacizumab             | 24.8 ± 0.3                         | 345± 119                        | 14.4± 1.6£               | 9.5 ± 0.8 **                 | 20.4 ± 2.7                       | 24.5 ± 2.6             | < 2                         |
| UniPR1331 + Bevacizumab | 23.5 ± 0.4                         | 157 ± 47                        | 20.6± 4.9*£              | 4.0 ± 4**, *                 | 17.7 ± 1.4                       | 8.5 ± 1.5              | 20.5 ± 4.5**                |

(1) no statistical significance in the weight of mice.

(2) \* p<0.005 vs saline; £p<0.05 in the comparison between combination vs single treatments;

(3) \*P<0.005 vs saline and in the comparison between combination vs single treatments; \*p<0.005 in the comparison Bevacizumab vs UniPR1331 and in comparison with combination and single treatments.

(4) \*\*p<0.0001 vs Saline and combination vs Bevacizumab; \*p<0.005 combination vs Bevacizumab and NS Bevacizumab vs UniPR1331;

(5) no statistical differences between groups.

(6) \*\*p<0.0001 for all comparisons.

(7) \*\* p<0.001 vs saline.



**Supplementary Table 6: Comparison of Kaplan-Meier curves in U251MG xenografts**

| <b>Comparison</b>                         | <b>Hazard ratio</b> | <b>Confidence interval</b> | <b>Significance</b> |
|-------------------------------------------|---------------------|----------------------------|---------------------|
| Vehicle vs UniPR1331                      | 2.41                | 0.88 to 8.57               | P=0.285             |
| Vehicle vs Bevacizumab                    | 3.01                | 1.09 to 8.31               | P<0.05              |
| UniPR1331 vs Bevacizumab                  | 0.90                | 0.37 to 2.17               | P = 0.7585          |
| Vehicle vs UniPR1331 +<br>Bevacizumab     | 3.95                | 1.33 to 11.76              | P<0.001             |
| UniPR1331 vs UniPR1331 +<br>Bevacizumab   | 2.93                | 1.47 to 8.00               | P<0.05              |
| Bevacizumab vs UniPR1331<br>+ Bevacizumab | 2.86                | 1.35 to 7.77               | P<0.05              |

**Supplementary Table 7: UniPR1331-deregulated miRNAs and targeted genes potentially involved in reduction of angiogenesis**

|                             | miRNAs <sup>a</sup> | RQ     | Enrichment p value <sup>b</sup> | Putative number of targeted genes <sup>c</sup> | High potentially target genes <sup>d</sup> |
|-----------------------------|---------------------|--------|---------------------------------|------------------------------------------------|--------------------------------------------|
|                             | hsa-miR-1208        | 2.021  | 1.94E-21                        | 78                                             | <i>CHI3L1</i>                              |
|                             | hsa-miR-1254        | 3.396  | 1.76E-17                        | 78                                             | <i>CX3CL1</i>                              |
|                             | hsa-miR-183-3p      | 15.021 | 1.16E-28                        | 78                                             | <i>CHRNA7, NTRK1, TWIST1</i>               |
| <b>UniPR-induced miRNAs</b> | hsa-miR-30c-1-3p    | 8.097  | 7.96E-16                        | 78                                             | <i>ADM2 RRAS</i>                           |
|                             | hsa-miR-329-3p      | 12.024 | 1.49E-27                        | 78                                             | <i>HIPK1, TWIST1</i>                       |
|                             | hsa-miR-34b-3p      | 4.038  | 3.55E-32                        | 78                                             | <i>IL1A</i>                                |
|                             | hsa-miR-543         | 2.850  | 3.62E-22                        | 78                                             | <i>C5</i>                                  |
|                             | hsa-miR-1226-5p     | 0.026  | 8.41E-11                        | 51                                             | <i>ROCK1, PML</i>                          |
|                             | hsa-miR-1270        | 0.028  | 1.84E-12                        | 51                                             | <i>SPINK5</i>                              |
|                             | hsa-miR-1298-5p     | 0.363  | 3.30E-17                        | 51                                             | <i>PML</i>                                 |
|                             | hsa-miR-1303        | 0.206  | 4.28E-13                        | 51                                             | <i>ANGPT4, NF1</i>                         |
|                             | hsa-miR-130a-5p     | 0.029  | 2.99E-17                        | 51                                             | <i>HRG, THBS4</i>                          |
|                             | hsa-miR-206         | 0.400  | 2.58E-18                        | 51                                             | <i>CCL2</i>                                |
|                             | hsa-miR-326         | 0.018  | 1.36E-18                        | 51                                             | <i>PDE3B, PML</i>                          |
|                             | hsa-miR-338-5p      | 0.405  | 2.21E-23                        | 51                                             | <i>TNMD</i>                                |
| <b>UniPR-reduced miRNAs</b> | hsa-miR-432-3p      | 0.067  | 3.67E-20                        | 51                                             | <i>PML</i>                                 |
|                             | hsa-miR-501-3p      | 0.012  | 2.24E-17                        | 47                                             | <i>PF4</i>                                 |
|                             | hsa-miR-520c-3p     | 0.033  | 1.48E-19                        | 51                                             | <i>FASLG, GTF2I</i>                        |
|                             | hsa-miR-545-3p      | 0.284  | 2.34E-21                        | 51                                             | <i>TNMD</i>                                |
|                             | hsa-miR-548b-5p     | 0.031  | 2.56E-20                        | 51                                             | <i>SPINK5, KRIT1, NF1, STAT1, RIT1K</i>    |
|                             | hsa-miR-593-3p      | 0.005  | 1.24E-14                        | 51                                             | <i>NPR1</i>                                |
|                             | hsa-miR-659-3p      | 0.323  | 3.04E-14                        | 51                                             | <i>FASLG, THBS4</i>                        |
|                             | hsa-miR-7-2-3p      | 0.294  | 4.79E-20                        | 51                                             | <i>GTF2I</i>                               |
|                             | hsa-miR-889-3p      | 0.343  | 0.000463174                     | 23                                             | <i>SPINK5</i>                              |
|                             | hsa-miR-941         | 0.134  | 1.90E-09                        | 31                                             | <i>COL4A3</i>                              |
|                             | hsa-miR-942-5p      | 0.256  | 1.30E-12                        | 51                                             | <i>COL4A3, THBS4</i>                       |

a. UniPR-deregulated miRNAs predicted to have significant ( $p < 0.01$ ) interactions with angiogenesis-related genes according the miRWalk algorithm; b. Fischer p value calculated by miRWalk tool in the prediction analysis of miRNAs enrichment for their binding sites within the genes on GO:0045766 and GO:0016525 ontologies; c. Putative number of targeted genes in the GO:0045766 and GO:0016525 annotations for UNIPR-induced miRNAs and UNIPR-reduced miRNAs, respectively; d. High significantly ( $p < 0.01$ ) predicted targeted genes, according to miRWalk algorithm. RQ, relative quantification.

**Supplementary Table 8: UniPR1331-induced miRNAs with experimental validated targeted genes on glioblastoma  
 DOID:3068 ontology**

| <b>UniPR-induced miRNAs</b> | <b>miRNAs Validated targeted genes</b>                                               |
|-----------------------------|--------------------------------------------------------------------------------------|
| hsa-miR-101-5p              | <i>ATM</i>                                                                           |
| hsa-miR-1179                | <i>ADAMTS4, CDK6, HMGB1, SOD2, WEE1</i>                                              |
| hsa-miR-1208                | <i>FYN, NFATC2</i>                                                                   |
| hsa-miR-1254                | <i>ERBB2, PKM</i>                                                                    |
| hsa-miR-1255b-5p            | <i>, EPHA4, EPHA2, MAPK1, MDM2, PIN1</i>                                             |
| hsa-miR-137                 | <i>AURKA, CDK6, KIT, MET, MTDH, PTGS2, TLR3</i>                                      |
| hsa-miR-15a-3p              | <i>VAV3</i>                                                                          |
| hsa-miR-183-3p              | <i>CDK6, NAMPT, PROM1, SOD2</i>                                                      |
| hsa-miR-190b                | <i>IGF1, KLF6</i>                                                                    |
| hsa-miR-26a-2-3p            | <i>BIRC5, PRKCH, PTEN</i>                                                            |
| hsa-miR-30c-1-3p            | <i>ADAMTS4, IGF1, PIN1, POLR3K, PPIA, POLR3K, TNFRSF10B</i>                          |
| hsa-miR-329-3p              | <i>ADAMTS4, CDK6, CTGF, CXCL12, ELK1, IGF1R, PIK3CG, PIK3R1, SOD2, TWIST1, VEGFA</i> |
| hsa-miR-337-3p              | <i>CLDN1, FPR1, RICTOR, STAT3</i>                                                    |
| hsa-miR-34b-3p              | <i>BCL2, CCND1, CDK6, CREB1, MET, MYC, NOTCH1, SNAIL, SOX2, VEGFA, WEE1</i>          |
| hsa-miR-363-5p              | <i>IGF1R, PKM, VEGFA</i>                                                             |
| hsa-miR-376a-5p             | <i>CREB1, PTEN</i>                                                                   |
| hsa-miR-449b-5p             | <i>CDK4, CDK6, CDKN1B, MET, VAV3</i>                                                 |
| hsa-miR-487b-3p             | <i>MYC, KRAS</i>                                                                     |
| hsa-miR-502-3p              | <i>CDK6, SOD2</i>                                                                    |
| hsa-miR-543                 | <i>ATM, HMGA2, PTK2, PTEN, TWIST1</i>                                                |
| hsa-miR-616-3p              | <i>CDK4</i>                                                                          |

**Supplementary Table 9: UNIPR-reduced miRNAs with experimental validated targeted genes on glioblastoma  
 DOI:3068 ontology**

| <b>UniPR -reduced miRNAs</b> | <b>Validated targeted genes</b>                                             |
|------------------------------|-----------------------------------------------------------------------------|
| hsa-miR-1226-5p              | <i>AURKA, CREB1, VAV3</i>                                                   |
| hsa-miR-125b-1-3p            | <i>IGF1R, SIPR, SOD2,</i>                                                   |
| hsa-miR-1270                 | <i>MDM2, MTDH</i>                                                           |
| hsa-miR-1291                 | <i>ABCC1</i>                                                                |
| hsa-miR-1298-5p              | <i>CDK6, EDN1, TAPBP</i>                                                    |
| hsa-miR-1303                 | <i>CDKN1B, CDK6, CYR61, HOXA10, MET, PHF20</i>                              |
| hsa-miR-130a-5p              | <i>VAV3, SOD2, WEE1</i>                                                     |
| hsa-miR-144-5p               | <i>SOD2</i>                                                                 |
| hsa-miR-199a-3p              | <i>AKT1, MAPK1, IGF1, HGF, MAPK8, MET, MTOR, PKM, PTGS2, SOD2</i>           |
| hsa-miR-206                  | <i>BCL2, CDK4, CCND1, GJA1, KRAS, IGF1R, MET, SMARCB1, WEE1</i>             |
| hsa-miR-26a-1-3p             | <i>BIRC5, PRKCH, PTEN</i>                                                   |
| hsa-miR-32-5p                | <i>ADAM10, AURKA, BCL2L11, HMGA2, ITGA6, MDM2, TLR3, TRIO, PTEN</i>         |
| hsa-miR-326                  | <i>AKT1, CCND1, ERBB2, GLI1, KRAS, NOTCH1, PKM, XRCC6</i>                   |
| hsa-miR-338-5p               | <i>CLDN1, CTGF, HOXA10, LRP1</i>                                            |
| hsa-miR-449a                 | <i>BCL2, CCND1, CDKN1, CDK4, CDK6, MYC, MET, NOTCH1, VAV3,</i>              |
| hsa-miR-501-3p               | <i>CDK6, SOD2</i>                                                           |
| hsa-miR-520c-3p              | <i>APP, CREB1, IGF1R, HMGB1, MTOR, TNFRSF10B, WEE1</i>                      |
| hsa-miR-545-3p               | <i>CDK4, CCND1, XRCC6, SOD2, LRP1, WEE1</i>                                 |
| hsa-miR-548b-5p              | <i>CDK4, INHBA, XRCC6, CHEK2, POLR1B</i>                                    |
| hsa-miR-549a                 | <i>MTDH, KIT</i>                                                            |
| hsa-miR-551b-5p              | <i>APP, CDK6, ERCC1, IGF1R, SOD2</i>                                        |
| hsa-miR-572                  | <i>ATM, CDKN1A</i>                                                          |
| hsa-miR-584-5p               | <i>FYN, MAPK1</i>                                                           |
| hsa-miR-593-3p               | <i>CCND1, ERBB2, FHL2, SOD2</i>                                             |
| hsa-miR-638                  | <i>SOD2, SOX2</i>                                                           |
| hsa-miR-639                  | <i>CDKN1A</i>                                                               |
| hsa-miR-659-3p               | <i>PYGO2</i>                                                                |
| hsa-miR-7-2-3p               | <i>KLF6, PHLPP1, RHOB, TWIST1, VEGFA</i>                                    |
| hsa-miR-744-3p               | <i>CCR2, CDK4</i>                                                           |
| hsa-miR-766-3p               | <i>BAX, CDK4, ERCC1, GAPDH, MAPK1, MDM2, PHF3, PKM, POLR3K, VAV3, XRCC6</i> |
| hsa-miR-767-5p               | <i>CASP8, HLA-A, MDM2, MMP2</i>                                             |
| hsa-miR-889-3p               | <i>ABCG2, HIF1A</i>                                                         |
| hsa-miR-92a-1-5p             | <i>FAS, MYC, PTEN, TNFRSF12A, TP53</i>                                      |
| hsa-miR-941                  | <i>XRCC6</i>                                                                |
| hsa-miR-942-5p               | <i>CDK6, CDKN1A, GALNT13, PHF3, PTPN11</i>                                  |
